# Supplementary material
Source: PubMed Central journal article supplement (PMC6690032)
Supplement: pnas.1905421116.sapp.pdf [file pnas.1905421116.sapp.pdf]

## Supplementary Information for:

**Genome editing using the endogenous Type I CRISPR-Cas system in *Lactobacillus crispatus***

Claudio Hidalgo-Cantabrana<sup>1</sup>, Yong Jun Goh<sup>1</sup>, Meichen Pan<sup>1</sup>, Rosemary Sanozky-Dawes<sup>1</sup>, Rodolphe Barrangou<sup>1\*</sup>

\* Corresponding author: Rodolphe Barrangou, [rbarran@ncsu.edu](mailto:rbarran@ncsu.edu)

1. Department of Food, Processing and Nutrition Sciences, 400 Dan Allen Drive, Campus box 7624, North Carolina State University, Raleigh, NC 27695, USA. Phone (919) 513-1644.

### **This PDF file includes:**

Figs. S1 to S2  
Tables S1 to S6

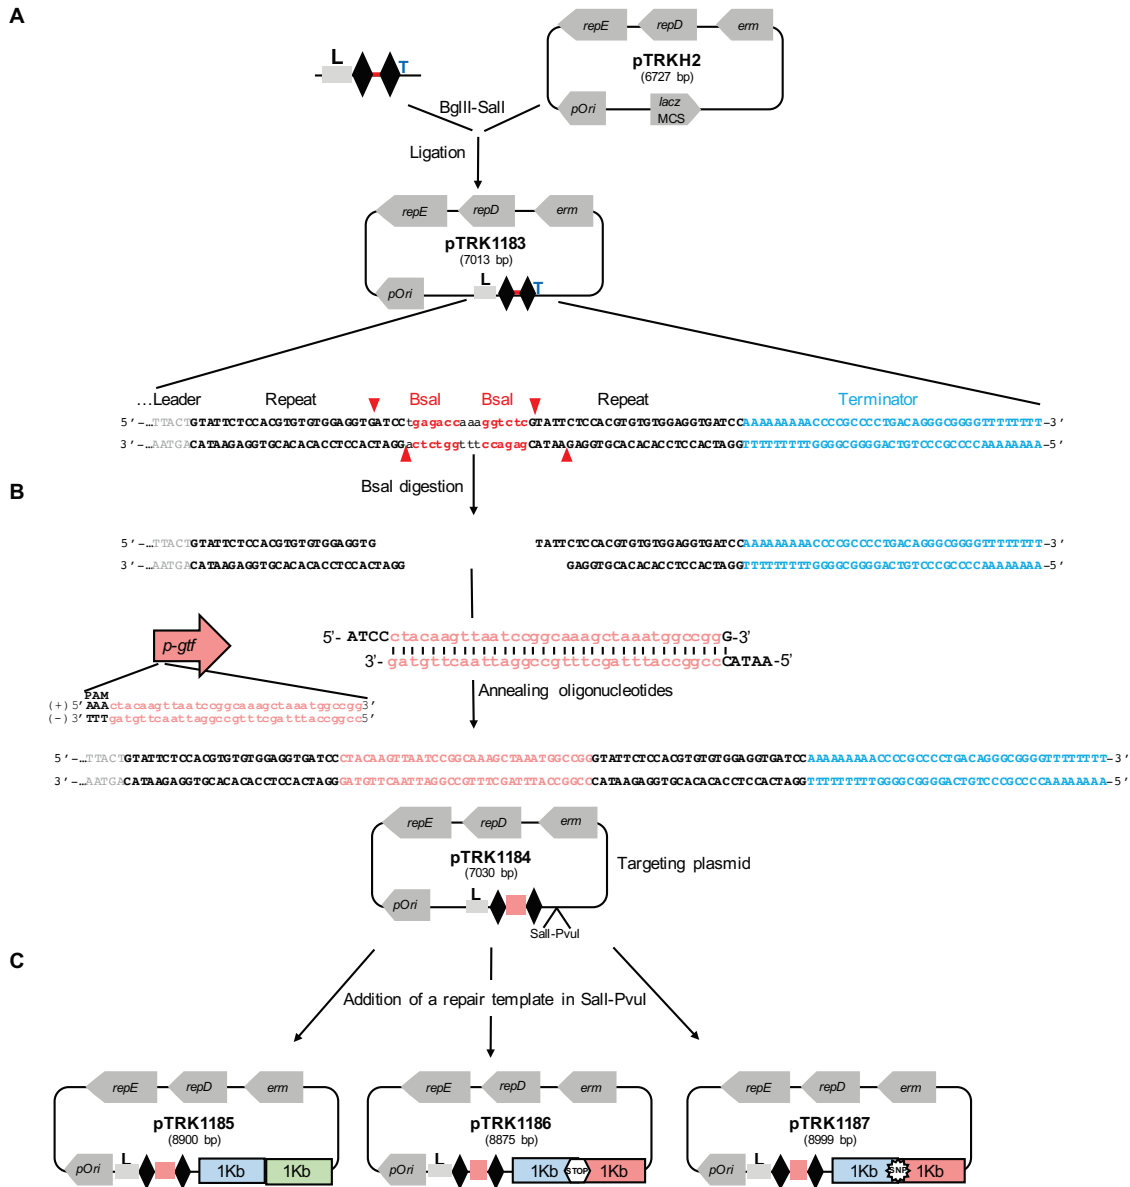

**Fig. S1. Cloning strategy to generate the plasmid-based technology to repurpose the endogenous CRISPR system Type I-E in *L. crispatus* NCK1350.** (A) An artificial crRNA containing the native leader (L) of the CRISPR-3 of *L. crispatus* NCK1350 as promoter, together with two repeats (native repeat sequence of NCK1350) and a Rho-terminator were synthesized as a gene block and cloned into BglII-SalI digested pTRKH2 to generate the plasmid-based technology pTRK1183. (B) The pTRK1183 plasmid allows cloning a spacer (target) using annealing oligonucleotides with overhand ends to the BsalI-digested pTRK1183 generating the targeting plasmid pTRK1184, that will express the crRNA to repurpose the endogenous CRISPR systems I-E against the desire target. (C) The generated targeting plasmid contains SalI-PvuI restriction sites for convenient and easy cloning of different repair templates to perform different genome editing outcomes as deletion (pTRK1185), insertion (pTRK1186) or single base editing (pTRK1187).

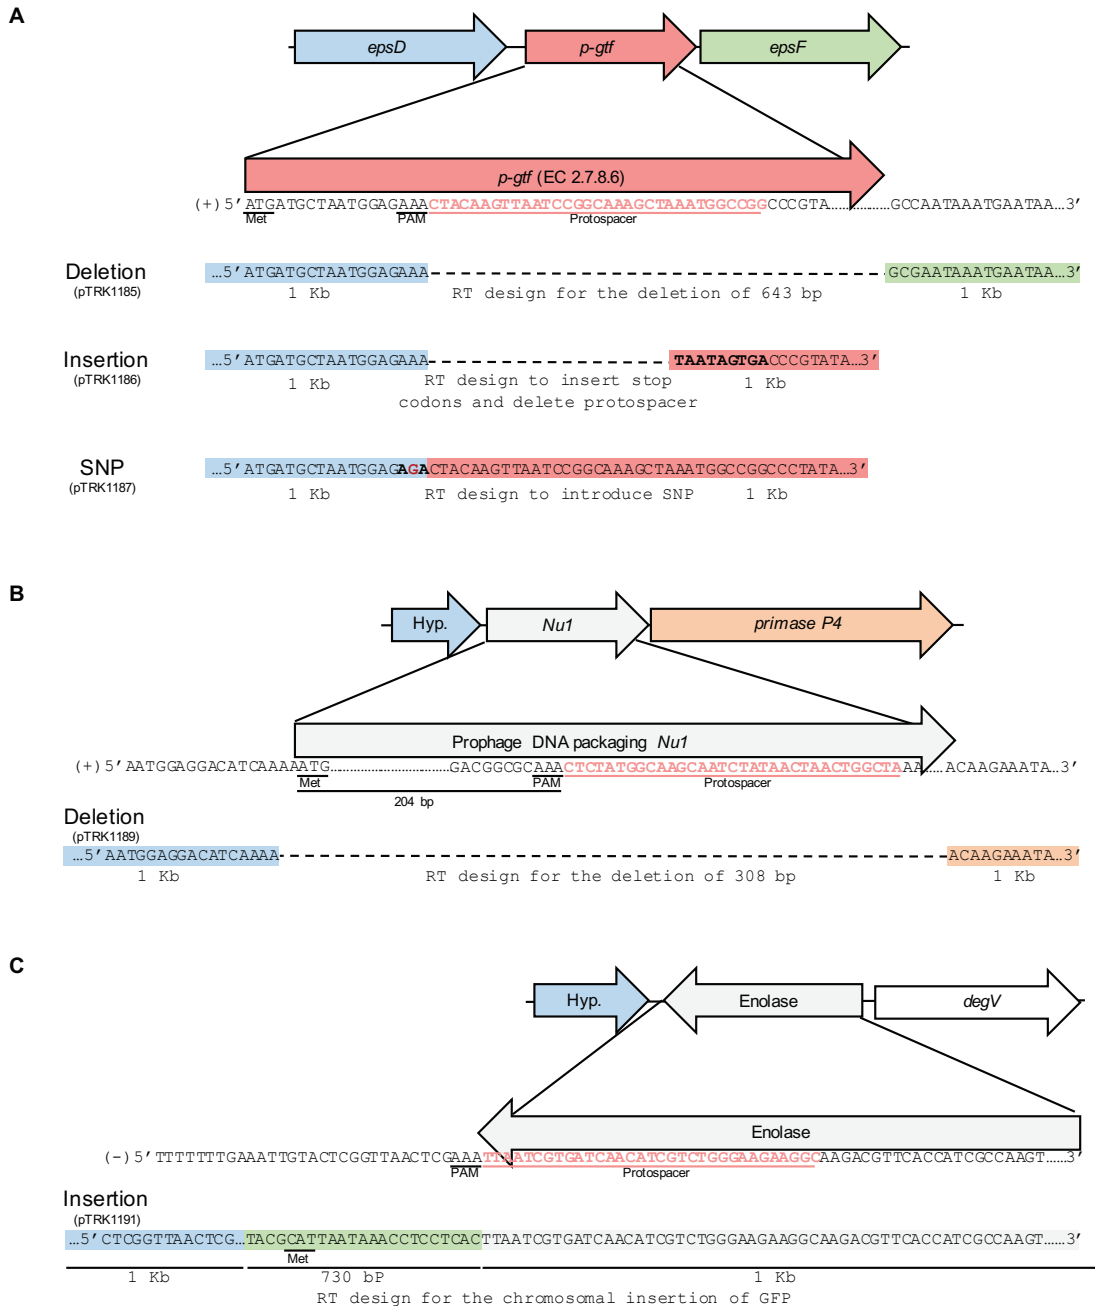

**Fig. S2. Cloning strategy to design the repair templates for the different genome editing outcomes.** A total of five different edits were performed in three different chromosomal targets with different designs associated with the homologous repair template (RT). For each design, the homologous arms were designed with an average length of 1 kb each. For each target, the chromosomal architecture, the gene of interest and the nucleotide sequence is displayed, with the protospacer targeted (T) region in red. (A) Design for the deletion, insertion of stop codons or single base substitution is shown for the exopolysaccharide priming-glycosyl transferase *p-gtf* (EC 2.7.8.6). Each template was cloned into the targeting plasmid pTRK1184 to generate pTRK1185, pTRK1186 and pTRK1187 respectively (see SI Appendix, Table S6). The homologous arm for the upstream region (blue) was designed until the PAM (5'-AAA-3')

downstream arm was designed according to the desire mutation to be introduced for the deletion or the insertion of stop codons. To perform single base editing, the upstream homologous arm contains the single base substitution in the PAM sequence, while the downstream region remains as the chromosomal sequence, including the protospacer sequence. (B) Repair template designed to delete the prophage DNA packaging *Nul* gene. The PAM motif detected in the prophage DNA packaging *Nul* gene is located closer to the 3' end of the gene. In this scenario the upstream arm was designed until the start codon of the *Nul* gene, located 204 bp upstream from PAM motif. This designed repair template was cloned into pTRK1188 to generate pTRK1189. (C) Repair template designed to perform a chromosomal insertion of the GFP in the downstream region of the highly expressed enolase gene. The upstream arm was designed until the PAM but without including the PAM sequence, followed by the GFP gene to be inserted (730 bp) carrying its own ribosomal binding site followed by the downstream arm that includes the protospacer region. The designed repair template was cloned into pTRK1190 to generate pTRK1191.

**Table S1. *Lactobacillus crispatus* genomes available at NCBI.**

| Source                         | Strain       | Isolation source               | GenBank genome |
|--------------------------------|--------------|--------------------------------|----------------|
| <b>Human isolates</b>          | 125-2-CHN    | Vaginal isolate                | ACPV00000000   |
|                                | 214-1        | Vaginal isolate                | ADGR00000000   |
|                                | 2029         | Healthy women genital tract    | AVFH00000000   |
|                                | C037         | Adult female bladder           | MAKH00000000   |
|                                | CTV-05       | Vaginal isolate                | ADML00000000   |
|                                | FB049-03     | Vaginal isolate                | AGZF00000000   |
|                                | FB077-07     | Vaginal isolate                | AGZG00000000   |
|                                | JV-V01       | Normal human vaginal flora     | ACKR00000000   |
|                                | MV-1A-US     | Vaginal isolate                | ACOG00000000   |
|                                | MV-3A-US     | Vaginal isolate                | ACQC00000000   |
|                                | OAB24-B      | Human urine                    | MAMR00000000   |
|                                | PSS7772C     | Human urine                    | LSQY00000000   |
|                                | SJ-3C-US     | Vaginal isolate                | ADDT00000000   |
|                                | VMC1         | Mid-vaginal wall from BV       | LJCZ00000000   |
|                                | VMC2         | Mid-vaginal wall from BV       | LJDA00000000   |
|                                | VMC3         | Mid-vaginal wall from BV       | LJGP00000000   |
|                                | VMC4         | Mid-vaginal wall from BV       | LJGQ00000000   |
|                                | VMC5         | Mid-vaginal wall healthy women | LJOK00000000   |
|                                | VMC6         | Mid-vaginal wall healthy women | LJOL00000000   |
|                                | VMC7         | Mid-vaginal wall healthy women | LJOM00000000   |
|                                | VMC8         | Mid-vaginal wall healthy women | LJON00000000   |
|                                | DSM 20584*   | Human Eye                      | AZCW00000000   |
|                                | EM-LC1       | Human fecal sample             | AXLM00000000   |
|                                | DISK12       | Human oral cavity              | MKXG01         |
|                                | NCK1350      | Human endoscopy                | SGWL00000000   |
| <b>Chicken/Turkey isolates</b> | C25          | Chicken cecum                  | MCJG00000000   |
|                                | JCM 5810     | Chicken feces                  | LSVK00000000   |
|                                | ST1          | Chicken crop isolate           | NC-014106      |
|                                | UMNLC1       | Turkey Ileum                   | LYQR00000000   |
|                                | UMNLC2       | Turkey Ileum                   | LYQS00000000   |
|                                | UMNLC3       | Turkey Ileum                   | LYQT00000000   |
|                                | UMNLC4       | Turkey Ileum                   | LYQU00000000   |
|                                | UMNLC5       | Turkey Ileum                   | LYQV00000000   |
|                                | UMNLC6       | Turkey Ileum                   | LYQW00000000   |
|                                | UMNLC7       | Turkey Ileum                   | LYQX00000000   |
|                                | UMNLC8       | Turkey Ileum                   | LYQY00000000   |
| UMNLC9                         | Turkey Ileum | LYQZ00000000                   |                |

|         |              |              |
|---------|--------------|--------------|
| UMNLC10 | Turkey Ileum | LYRA00000000 |
| UMNLC11 | Turkey Ileum | LYRB00000000 |
| UMNLC12 | Turkey Ileum | LYRC00000000 |
| UMNLC13 | Turkey Ileum | LYRD00000000 |
| UMNLC14 | Turkey Ileum | LYRE00000000 |
| UMNLC15 | Turkey Ileum | LYRF00000000 |
| UMNLC16 | Turkey Ileum | LYRG00000000 |
| UMNLC18 | Turkey Ileum | LYRH00000000 |
| UMNLC19 | Turkey Ileum | LYRI00000000 |
| UMNLC20 | Turkey Ileum | LYRK00000000 |
| UMNLC21 | Turkey Ileum | LYRK00000000 |
| UMNLC22 | Turkey Ileum | LYRL00000000 |
| UMNLC23 | Turkey Ileum | LYRM00000000 |
| UMNLC24 | Turkey Ileum | LYRN00000000 |
| UMNCL25 | Turkey Ileum | LYRO00000000 |

**Table S2. CRISPR-Cas systems in *Lactobacillus crispatus* genomes available at NCBI**

| Isolation source          | Strain    | CRISPR Subtype                                                                                                               | Repeat sequence*                      | Repeat Length | No. spacers | cas1 | cas3 | cas9 |   |
|---------------------------|-----------|------------------------------------------------------------------------------------------------------------------------------|---------------------------------------|---------------|-------------|------|------|------|---|
| Human isolates            | 125-2-CHN | II-A                                                                                                                         | GTTTTAGATGATTGTTAGATCAATGAGGTTTTAGATC | 36            | 3           | -    | -    | -    |   |
|                           | 214-1     | II-A                                                                                                                         | GTTTTAGATGATTGTTAGATCAATGAGGTTTTAGATC | 36            | 6           | Y    | -    | Y    |   |
|                           | 2029      | II-A                                                                                                                         | GTTTTAGATGGTTGTTAGATCAATGAGGTTTTAGATC | 36            | 7           | Y    | -    | Y    |   |
|                           | C037      | II-A                                                                                                                         | GTTTTAGATGATTGTTAGATCAATGAGGTTTTAGATC | 36            | 3           | Y    | -    | Y    |   |
|                           |           | I-E                                                                                                                          | GTATTCTCCACGTGTGGAGGTGATCC            | 28            | 2           | -    | -    | -    |   |
|                           | CTV-05    | II-A                                                                                                                         | GTTTTAGATGATTGTTAGATCAATGAGGTTTTAGATC | 36            | 5           | Y    | -    | Y    |   |
|                           | FB049-03  | II-A                                                                                                                         | GTTTTAGATGATTGTTAGATCAATGAGGTTTTAGATC | 36            | 7           | Y    | -    | Y    |   |
|                           |           | I-E                                                                                                                          | GTATTCTCCACACATGTGGAGGTGATCC          | 28            | 4           | -    | -    | -    |   |
|                           | FB077-07  | II-A                                                                                                                         | GTTTTAGATGATTGTTAGATCAATGAGGTTTTAGATC | 36            | 7           | Y    | -    | Y    |   |
|                           | JV-V01    | II-A                                                                                                                         | GTTTTAGATGATTGTTAGATCAATGAGGTTTTAGATC | 36            | 4           | Y    | -    | Y    |   |
|                           | MV-1A-US  | II-A                                                                                                                         | GTTTTAGATGATTGTTAGATCAATGAGGTTTTAGATC | 36            | 3           | Y    | -    | Y    |   |
|                           | MV-3A-US  | II-A                                                                                                                         | GTTTTAGATGATTGTTAGATCAATGAGGTTTTAGATC | 36            | 4           | Y    | -    | Y    |   |
|                           | OAB24-B   | II-A                                                                                                                         | -                                     | -             | -           | -    | Y    | -    | Y |
|                           |           | I-E                                                                                                                          | GTATTCTCCACGTGTGGAGGTGATCC            | 28            | 2           | -    | -    | -    |   |
|                           | PSS7772C  | II-A                                                                                                                         | GTTTTAGATGATTGTTAGATCAATGAGGTTTTAGATC | 36            | 6           | Y    | -    | Y    |   |
|                           | SJ-3C-US  | II-A                                                                                                                         | GTTTTAGATGATTGTTAGATCAATGAGGTTTTAGATC | 36            | 7           | Y    | -    | Y    |   |
|                           | VMC1      | II-A                                                                                                                         | GTTTTAGATGATTGTTAGATCAATGAGGTTTTAGATC | 36            | 7           | Y    | -    | Y    |   |
|                           |           | I-E                                                                                                                          | GTATTCTCCACACATGTGGAGGTGATCC          | 28            | 4           | -    | -    | -    |   |
|                           | VMC2      | II-A                                                                                                                         | GTTTTAGATGATTGTTAGATCAATGAGGTTTTAGATC | 36            | 6           | Y    | -    | Y    |   |
|                           | VMC3      | I-B                                                                                                                          | GTATTTATTTATCTTAAAGAGAAATGTAAT        | 30            | 13          | Y    | Y    | -    |   |
|                           |           | I-E                                                                                                                          | GTATTCTCCACGCAATGTGGAGGTGATCC         | 28            | 35          | Y    | Y    | -    |   |
|                           |           |                                                                                                                              | GTATTCTCCACGAGTGTGGGGATCCTAT          | 28            |             |      |      |      |   |
|                           | VMC4      | II-A                                                                                                                         | GTTTTAGATGATTGTTAGATCAATGAGGTTTTAGATC | 36            | 4           | Y    | -    | Y    |   |
|                           | VMC5      | II-A                                                                                                                         | GTTTTAGATGATTGTTAGATCAATGAGGTTTTAGATC | 36            | 4           | Y    | -    | Y    |   |
|                           |           | I-E                                                                                                                          | GTATTCTCCACGTGTGGAGGTGATCC            | 28            | 4           | -    | -    | -    |   |
|                           | VMC6      | II-A                                                                                                                         | GTTTTAGATGATTGTTAGATCAATGAGGTTTTAGATC | 36            | 7           | Y    | -    | Y    |   |
|                           |           | I-E                                                                                                                          | GTATTCTCCACACATGTGGAGGTGATCC          | 28            | 4           | -    | -    | -    |   |
|                           | VMC7      | II-A                                                                                                                         | GTTTTAGATGGTTGTTAGATCAATGAGGTTTTAGATC | 36            | 5           | Y    | -    | Y    |   |
| VMC8                      | II-A      | GTTTTAGATGGTTGTTAGATCAATGAGGTTTTAGATC                                                                                        | 36                                    | 7             | Y           | -    | Y    |      |   |
| DSM 20584                 | I-E       | GTATTCTCCACGTGTGGAGGTGATCC                                                                                                   | 28                                    | 5             | Y           | Y    | -    |      |   |
| EM-LC1                    | -         | -                                                                                                                            | -                                     | -             | -           | -    | -    |      |   |
| DISK12                    | I-E       | GTATTCTCCACGTAATGTGGAGGTGATCC                                                                                                | 28                                    | 10            | -           | -    | -    |      |   |
| NCK1350                   | I-E       | GTATTCTCCACGTAATGTGGAGGTGATCC<br>GTATTCTCCACGTAATGTGGAGGTGATCC<br>GTATTCTCCACACATGTGGAGGTGATCC<br>GTATTCTCCACGTGTGGAGGTGATCC | 28                                    | 53            | Y           | Y    | -    |      |   |
| Chicken / Turkey isolates | C25       | I-E                                                                                                                          | GTATTCTCCACGTGTGGAGGTGATCC            | 28            | 37          | Y    | Y    | -    |   |
|                           | JCM 5810  | I-E                                                                                                                          | GTATTCTCCACGCGTGTGGAGGTGATCC          | 28            | 55          | Y    | Y    | -    |   |
|                           | ST1       | I-E                                                                                                                          | GTATTCTCCACGTGTGGAGGTGATCC            | 28            | 38          | Y    | Y    | -    |   |
|                           |           |                                                                                                                              | GTATTCTCCACGTAATGTGGAGGTGATCC         | 29            |             |      |      |      |   |
|                           | UMNLC1    | I-E                                                                                                                          | GTATTCTCCACGTGTGGAGGTGATCC            | 28            | 49          | Y    | Y    | -    |   |
| UMNLC2                    | I-E       | GTATTCTCCACACATGTGGAGGTGATCC                                                                                                 | 28                                    | 40            | Y           | Y    | -    |      |   |

|         |     |                                                               |          |    |   |   |   |
|---------|-----|---------------------------------------------------------------|----------|----|---|---|---|
| UMNLC3  | I-E | GTATTCTCCACACATGTGGAGGTGATCC                                  | 28       | 40 | Y | Y | - |
| UMNLC4  | I-E | GTATTCTCCACGTATGTGGAGGTGATCC                                  | 28       | 40 | Y | Y | - |
| UMNLC5  | I-E | GTATTCTCCACGTATGTGGAGGTGATCC                                  | 28       | 39 | Y | Y | - |
| UMNLC6  | I-E | GTATTCTCCACGTATGTGGAGGTGATCC                                  | 28       | 64 | Y | Y | - |
| UMNLC7  | I-E | GTATTCTCCACGTATGTGGAGGTGATCC                                  | 28       | 36 | Y | Y | - |
| UMNLC8  | I-E | GTATTCTCCACGTATGTGGAGGTGATCC                                  | 28       | 46 | Y | Y | - |
| UMNLC9  | I-E | GTATTCTCCACGTATGTGGAGGTGATCC                                  | 28       | 76 | Y | Y | - |
| UMNLC10 | I-E | GTATTCTCCACGTATGTGGAGGTGATCC                                  | 28       | 56 | Y | Y | - |
| UMNLC11 | I-E | GTATTCTCCACGTGTGTGGAGGTGATCC<br>GTATTCTCCACGTGTGTGGAGGTGATCCT | 28<br>29 | 47 | Y | Y | - |
| UMNLC12 | I-E | GTATTCTCCACGTATGTGGAGGTGATCC                                  | 28       | 56 | Y | Y | - |
| UMNLC13 | I-E | GTATTCTCCACGTATGTGGAGGTGATCC                                  | 28       | 43 | Y | Y | - |
| UMNLC14 | I-E | GTATTCTCCACGTATGTGGAGGTGATCC                                  | 28       | 63 | Y | Y | - |
| UMNLC15 | I-E | GTATTCTCCACGTATGTGGAGGTGATCC                                  | 28       | 40 | Y | Y | - |
| UMNLC16 | I-E | GTATTCTCCACGTATGTGGAGGTGATCC                                  | 28       | 50 | Y | Y | - |
| UMNLC18 | I-E | GTATTCTCCACGTATGTGGAGGTGATCC                                  | 28       | 66 | Y | Y | - |
| UMNLC19 | I-E | GTATTCTCCACGTATGTGGAGGTGATCC                                  | 28       | 66 | Y | Y | - |
| UMNLC20 | I-E | GTATTCTCCACGTATGTGGAGGTGATCC                                  | 28       | 62 | Y | Y | - |
| UMNLC21 | I-E | GTATTCTCCACGTATGTGGAGGTGATCC<br>GTATTCTCCACGTATGTGGAGGTGATCCT | 28<br>29 | 62 | Y | Y | - |
| UMNLC22 | I-E | GTATTCTCCACGTATGTGGAGGTGATCC                                  | 28       | 62 | Y | Y | - |
| UMNLC23 | I-E | GTATTCTCCACGTATGTGGAGGTGATCC<br>GTATTCTCCACGTATGTGGAGGTGATCCT | 28<br>29 | 62 | Y | Y | - |
| UMNLC24 | I-E | GTATTCTCCACGTATGTGGAGGTGATCC<br>GTATTCTCCACGTATGTGGAGGTGATCCT | 28<br>29 | 62 | Y | Y | - |
| UMNLC25 | I-E | GTATTCTCCACGTATGTGGAGGTGATCC<br>GTATTCTCCACGTATGTGGAGGTGATCCT | 28<br>29 | 64 | Y | Y | - |



**Table S3. Protospacers targeted by *L. crispatus* spacers from CRISPR subtype II-A**

| Isolation Source | Strain   | Spacer - Contig                         | PAM protospacers                        | Plasmid / Phage                         | Strain                                  |
|------------------|----------|-----------------------------------------|-----------------------------------------|-----------------------------------------|-----------------------------------------|
| Human            | 125      | 3-                                      | TTCGTGATTAGTTTGTATCTCGTTGTTGTAAGCGACGAA | rudivirus                               | Sulfolobales Mexican rudivirus          |
|                  | 214      | 5-82                                    | AAATTAACACCTCTATTATTTTTTTCTGTAAGATACTT  | pDF308                                  | <i>Deferribacter desulfuricans</i> SSM1 |
|                  | CTV-05   | 1-49                                    | CCCACGTTGGTACCTTCGCAAAGCTATTGGGCGCCAC   | Phage EFDG1                             | <i>Enterococcus faecalis</i>            |
|                  | JVVO1    | 4-84                                    | AAAAAAAGGATTATCTGTACCATCATCTAACGGCGTA   | pXNC1                                   | Xenorhabdus nematophila ATCC 19061      |
|                  |          |                                         |                                         | phage vB-PmiM-Pm5461                    |                                         |
|                  | MV-1A-US | 1-65                                    | CAGAAAATGGTTTATTTGTTCATTTCTTCATGGCGGGCT | phage vB-PmiM-Pm5461                    |                                         |
|                  | MV-3A-US | 4-60                                    | TAAAAAAAGGATTATCTGTACCATCATCTAACGGCGTA  | pXNC1                                   | Xenorhabdus nematophila ATCC 19061      |
|                  |          |                                         |                                         | pXNC2                                   | Xenorhabdus nematophila AN61            |
|                  | PSS7772  | 1-21                                    | TAAAAAAAGGATTATCTGTACCATCATCTAACGGCGTA  | phage vB-PmiM-Pm5461                    | Proteus phage                           |
|                  |          |                                         |                                         | pXNC1                                   | Xenorhabdus nematophila ATCC 19061      |
|                  | SJ-3C-US | 5-67                                    | CCCACGTTGGTACCTTCGCAAAGCTATTGGGCGCCAC   | pXNC2                                   | Xenorhabdus nematophila AN61            |
|                  |          |                                         |                                         | Phage EFDG1                             | <i>Enterococcus faecalis</i>            |
|                  | VMC1     | 3-15                                    | CCCACGTTGGTACCTTCGCAAAGCTATTGGGCGCCAC   | Phage EFDG1                             | <i>Enterococcus faecalis</i>            |
|                  | VMC2     | 5-153                                   | CCCACGTTGGTACCTTCGCAAAGCTATTGGGCGCCAC   | Phage EFDG1                             | <i>Enterococcus faecalis</i>            |
|                  | VMC4     | 4-76                                    | TAAAAAAAGGATTATCTGTACCATCATCTAACGGCGTA  | pXNC1                                   | Xenorhabdus nematophila ATCC 19061      |
|                  |          |                                         |                                         | pXNC2                                   | Xenorhabdus nematophila AN61            |
| VMC5             | 3-117    | CAGAAAATGGTTTATTTGTTCATTTCTTCATGGCGGGCT | phage vB-PmiM-Pm5461                    | Proteus phage                           |                                         |
|                  |          |                                         | CCCACGTTGGTACCTTCGCAAAGCTATTGGGCGCCAC   | Phage EFDG1                             | <i>Enterococcus faecalis</i>            |
| VMC6             | 5-50     | AAATTAACACCTCTATTATTTTTTTCTGTAAGATACTT  | Phage EFDG1                             | <i>Enterococcus faecalis</i>            |                                         |
|                  |          |                                         | pDF308                                  | <i>Deferribacter desulfuricans</i> SSM1 |                                         |

\*Underlined nucleotides indicate the putative PAM

**Table S4. Protospacers targeted by *L. crispatus* spacers from CRISPR subtype I-B**

| Isolation Source | Strain | Spacer - Contig | PAM protospacers                                       | Plasmid / Phage       | Strain                |
|------------------|--------|-----------------|--------------------------------------------------------|-----------------------|-----------------------|
| Human            | VMC3   | 1               | GTCCAC <u>CCG</u> TAACTAAGAACGACAGGATCTTTTTCTAGGTCAA   | Phage KC5a            | <i>Lactobacillus</i>  |
|                  |        | 1               | TTTAT <u>GGT</u> GTATCAAGAACAACAGATTCAGTTTTTAGTCAA     | pLM1                  | <i>L. mucosae</i> LM1 |
|                  |        | 2               | GTTGAT <u>GGG</u> TTATGGGAAAAATGCCCGTTCAAAAAATCTTTATAA | Phage e112            | <i>E.coli</i> O157:H7 |
|                  |        | 2               | GTTGAT <u>GGG</u> AAAAATGCCCGTTCAAAAAATCTCTATAA        | phage vB_EcoM_ACG-C40 |                       |
|                  |        | 4               | ACCTG <u>GTG</u> GCAACAGCAACTACTCCTGTAACCTCTGCCTGCAAAC | phage vB_CsaM_GAP31   |                       |
|                  |        | 5               | CCTGCC <u>GGG</u> GATGGTGAATCCCTCGGCAGGGCGCATTACAGTCG  | Phage Job42           |                       |
|                  |        | 6               | GATTTACCGTTAATAGAATCTGGCGATAAAGTCAACATTGTTCTGC         | Phage 0507-KN2-1      | <i>Klebsiella</i>     |

\* Underlined nucleotides indicate the predicted PAM

**Table S5. Protospacers targeted by *L. crispatus* spacers from CRISPR subtype I-E**

| Isolation Source | Strain  | Spacer - Contig                                    | PAM protospacers                                    | Plasmid / Phage              | Strain                              |
|------------------|---------|----------------------------------------------------|-----------------------------------------------------|------------------------------|-------------------------------------|
| Human            | VMC3    | 2-36                                               | GCTT <u>CAAAC</u> ATGGGTGAGATTATCCGGAAAGGATAAGATATG | pUMNLJ22                     | <i>L. johnsonii</i> UMNLJ22         |
|                  |         | 16-36                                              | AGCCT <u>TAA</u> CAGATGGATTAAACAATTTTTAACGGCTGGTTT  | pL11995-5                    | <i>L. paracollinoides</i> TMW1.1995 |
|                  |         |                                                    |                                                     | pR2                          | <i>L. salivarius</i> Ren            |
|                  | NCK1350 | 1-18                                               | AATCGAAAGTCCGCATGACTTCGTTGACAATAGCTCTCA             | pPC892-4                     | <i>P. pentosaceus</i> SRCM100892    |
|                  |         |                                                    |                                                     | pL1481-4                     | <i>L. lindneri</i> TMW1.481         |
|                  |         |                                                    |                                                     | pL11991-8                    | <i>L. backii</i> TMW1.1991          |
|                  |         |                                                    | plca36 (repA)                                       | <i>L. casei</i> Zhang        |                                     |
| Poultry          | C25     | 1-18                                               | TCAAT <u>TAA</u> CTAACAATGCTCAAACGTTAAATATGGTTGATA  | plasmid1                     | <i>L. amylovorus</i> GRL1112        |
|                  |         | 1-18                                               | AAAAT <u>TAA</u> CTAACAACGCACAAACGTTAAATTTGGTTGATA  | pLH1                         | <i>L. helveticus</i> DSM20075       |
|                  | JCM5810 | 3-4                                                | AAGCACA <u>AA</u> CCCTTGCATAAATCGAGCGATCCGACCAGCATA | pUMNLJ22                     | <i>L. johnsonii</i> UMNLJ22         |
|                  |         | 3-4                                                | AAGCACA <u>AA</u> CCCTTGCATAAATCGAGCGATCCGACCAGCATA | pUMNLJ21                     | <i>L. johnsonii</i> UMNLJ21         |
|                  |         | 15-4                                               | TGCCG <u>TAA</u> CAATGACATGGCAAAAGAGCTTTGCATGATGT   | phiJB                        | <i>L. delbrueckii bulgaricus</i>    |
|                  | ST1     | 8-2                                                | TTAACT <u>AA</u> CAATGCTCAAACGTTAAATATGGTTGATAAAGA  | plasmid1                     | <i>L. amylovorus</i> GRL1112        |
|                  | UMNLC1  | 13-19                                              | ATAAAAAATAGGGGATTCGCAATACTTGCGAACCTATCG             | phage AQ113                  | <i>L. helveticus</i>                |
|                  | UMNLC6  | 13-32                                              | TTAACT <u>AA</u> CAATGCTCAAACGTTAAATATGGTTGATAAAGA  | plasmid1                     | <i>L. amylovorus</i> GRL1112        |
|                  |         | 11-32                                              | GGGCT <u>TAA</u> TTGTATCAATGCTAATAAGAATGTTCTGCCCGG  | phage phi hlb1               | <i>L. gasseri</i>                   |
|                  |         | 12-38                                              | CATGAAAAATAATCTGCTACTTTTTGCTAAATCTTCAGCTTTT         | Phage PLgT-1                 | <i>Lactococcus</i>                  |
|                  | UMNLC9  | 22-09                                              | GAAAT <u>TAA</u> TGTTGGTGCATTAATGGAAGATGCATATTTAGA  | phage AQ113                  | <i>L. helveticus</i>                |
|                  |         | 6-50                                               | CTGCT <u>CA</u> AATTAGTTAAAGTTTTGGTGGTTTGGCTTCTGCG  | phage AQ113                  | <i>L. helveticus</i>                |
| 17-09            |         | TTAACT <u>AA</u> CAATGCTCAAACGTTAAATATGGTTGATAAAGA | plasmid1                                            | <i>L. amylovorus</i> GRL1112 |                                     |

\* Underlined nucleotides indicate the predicted PAM

**Table S6. Spacers, annealing oligonucleotides and oligonucleotides used in this study**

| <b>Protospacers</b>                        | <b>Sequence 5' - 3'</b>                                                |
|--------------------------------------------|------------------------------------------------------------------------|
| S6-CRISPR1                                 | tatataagatctCAGTTTAGGTACCATTTTTTTGACGATCAAAATCgtcgactatata             |
| PS6-CRISPR1                                | tatataagatct <b>AAA</b> CAGTTTAGGTACCATTTTTTTGACGATCAAAATCgtcgactatata |
| S21-CRISPR2                                | tatataagatctCAGTTCAAATGTTACTTGGCCACGCAAATATAAgtcgactatata              |
| PS21-CRISPR2                               | tatataagatct <b>AAA</b> CAGTTCAAATGTTACTTGGCCACGCAAATATAAgtcgactatata  |
| S26-CRISPR3                                | tatataagatctCGTGTGTGTTCCATATTCATTAGATAAAACATCgtcgactatata              |
| PS26-CRISPR3                               | tatataagatct <b>AAA</b> CGTGTGTGTTCCATATTCATTAGATAAAACATCgtcgactatata  |
| <b>Annealing Oligos (ssDNA)</b>            | <b>Sequence 5' - 3'</b>                                                |
| <i>p-gtf_A</i>                             | atccCTACAAGTTAATCCGGCAAAGCTAAATGGCCGGg                                 |
| <i>p-gtf_B</i>                             | aatacCCGGCCATTTAGCTTTGCCGGATTAACCTGTAG                                 |
| <i>Nul_A</i>                               | atccCTCTATGGCAAGCAATCTATAACTAACTGGCTAg                                 |
| <i>Nul_B</i>                               | aatacTAGCCAGTTAGTTATAGATTGCTTGCCATAGAG                                 |
| <i>enolase_A</i>                           | atccTTAATCGTGATCAACATCGTCTGGGAAGAAGGCg                                 |
| <i>enolase_B</i>                           | aatacGCCTTCTTCCCAGACGATGTTGATCACGATTAA                                 |
| <b>Oligonucleotides</b>                    | <b>Sequence 5' - 3'</b>                                                |
| <i>p-gtf_F</i>                             | ATGGCGACCCAGTTCAGATG                                                   |
| <i>p-gtf_R</i>                             | ATCTCTCTACACCACCGGCA                                                   |
| <i>p-gtf_RT<sub>KO</sub>_SalI_F</i>        | gtaataagtcgacTTAGAGCTGAAAACGGTGGC                                      |
| <i>p-gtf_RT<sub>KO</sub>_PvuI_R</i>        | ttagtacgatcgCAACTAATATACCATTACAG                                       |
| <i>p-gtf_RT<sub>STOP</sub>_SalI_F</i>      | tatataagtcgacTTAGAGCTGAAAACGGTGGC                                      |
| <i>p-gtf_RT<sub>STOP</sub>_PvuI_R</i>      | tatatacgatcgGCCATGTGGATTATAGATAA                                       |
| <i>p-gtf_RT<sub>SNP</sub>_Up_SalI_F</i>    | tatataagtcgacTTAGAGCTGAAAACGGTGGC                                      |
| <i>p-gtf_RT<sub>SNP</sub>_Up_Rev</i>       | TCTCTCCATTAGCATCATTGCC                                                 |
| <i>p-gtf_RT<sub>SNP</sub>_Dw_SOE-PCR_F</i> | caatgatgctaataggagagacTACAAGTTAATCCGGCAAA                              |
| <i>p-gtf_RT<sub>SNP</sub>_Dw_PvuI_R</i>    | tatatacgatcgGCCATGTGGATTATAGATAA                                       |
| <i>KO_p-gtf_F</i>                          | CACCTTGACGGCGTAGTCTT                                                   |
| <i>KO_p-gtf_R</i>                          | TCATGCCACACCCTTTTAGCA                                                  |
| <i>Nul_F</i>                               | GGTAGCGGCAGAACAAGGAA                                                   |
| <i>Nul_R</i>                               | GCGCCTTTGAATATTGGGTCA                                                  |
| <i>Nul_RT<sub>KO</sub>_SalI_F</i>          | tatataagtcgacAAGTTTATTATTTTCTTTAC                                      |
| <i>Nul_RT<sub>KO</sub>_PvuI_R</i>          | tatatacgatcgAATTATTATCAGTTAAA                                          |
| <i>KO_Nul_F</i>                            | CCACCGCCATTATTTGACC                                                    |
| <i>KO_Nul_R</i>                            | AGCGCCTAGTACCCGTCTTA                                                   |
| <i>GFP_F</i>                               | CCAACGGGCAAGGCAAAATA                                                   |
| <i>GFP_R</i>                               | CTGGTGACACCTTCATCGCT                                                   |
| <i>enolase_RT<sub>GFP</sub>_Dw_SalI_F</i>  | tatataagtcgacGCGCAGCTAGATTAAATGAT                                      |
| <i>enolase_RT<sub>GFP</sub>_Dw_R</i>       | CGAGTTAACCGAGTACAAT                                                    |
| <i>enolase_RT<sub>GFP</sub>_Up_F</i>       | TTAATCGTGATCAACATCGT                                                   |
| <i>enolase_RT<sub>GFP</sub>_Up_PvuI_R</i>  | tatatacgatcgAGACGGTACTCCAAAACAAG                                       |

|                                  |                                                     |
|----------------------------------|-----------------------------------------------------|
| RT <sub>GFP</sub> _GFP_SOE-PCR_F | aattgtactcggttaactcg <b>TTATTTGTATAGTTCATCCATGC</b> |
| RT <sub>GFP</sub> _GFP_SOE-PCR_R | acgatggtgatcacgattaa <b>GTGAGGAGGTTTATTAATGCGTA</b> |
| GFP_Insertion_F                  | <u>GCATTGCGCGACAAGATTGA</u>                         |
| GFP_Insertion_R                  | <u>CGACTCACGTGGTAACCCAA</u>                         |
| M13_F                            | <u>GCTCGTATGTTGTGTGGAAT</u>                         |
| M13_R                            | <u>GGATGTGCTGCAAGGCGAT</u>                          |
| <i>lacZ</i> _R                   | <u>CATTCAGGCTGCGCAACTGT</u>                         |
| 253_R                            | <u>GAATGATCGACCAGGCAATG</u>                         |
| <i>erm</i> _F                    | <u>CAGGTAAAGGGCATTTAAC</u>                          |
| <i>erm</i> _R                    | <u>TATTCTCGATTGACCCATTT</u>                         |

---

\* The PAM sequence cloned with the protospacers is showed in bold.

\*\* The overhand ends of the annealing oligonucleotides to BsaI site are in lowercase

\*\*\* Restriction sites present on the spacers and the oligonucleotides are underlined

\*\*\*\* Overlap region of SOE-PCR oligonucleotides are showed in lower case
